# Supplementary material for: Rock and snow differentiation from colour (RGB) images
Source: Copernicus journal article supplement (doi:10.5194/tc-2020-115), 2020-07-28
Supplement: Supplementary file 1 [file Rock-Snow RGB Threshold Calibration.xls]

## Sheet: Rock
		Blue	Red	Red/Blue
	Type	Blue band raster value	Red band raster value
Example Row: DELETE BEFORE USE	Rock	40	40	1

## Sheet: Snow
		Blue	Red	Red/Blue
	Type	Blue band raster value	Red band raster value
Example Row: DELETE BEFORE USE	Snow	80	80	1

## Sheet: Threshold Calibration
	Manually Defined Calibration Points
	X (R/B)	Y (R)
	0.4	11
	0.67	21
	0.93	49
	1.2	100
